# Supplementary material
Source: MDPI journal article supplement (https://www.mdpi.com/2071-1050/15/2/928)
Supplement: s1 [file s1]

**Table S1.** The method for data transformation for each variable in this study.

| Variable                        | Transformed method |
|---------------------------------|--------------------|
| pH                              | No transformed     |
| NH <sub>4</sub> <sup>+</sup> -N | BoxCox             |
| NO <sub>3</sub> <sup>-</sup> -N | BoxCox             |
| TDN                             | No transformed     |
| TN                              | No transformed     |
| DOC                             | BoxCox             |
| SOC                             | No transformed     |
| AG                              | BoxCox             |
| BG                              | sqrt               |
| BX                              | sqrt               |
| CBH                             | BoxCox             |
| LA                              | BoxCox             |
| NAG                             | BoxCox             |
| Urease                          | No transformed     |
| MBC                             | No transformed     |
| MBN                             | sqrt               |
| Microbial                       | BoxCox             |
| C: N                            | BoxCox             |
| N <sub>2</sub> O                | BoxCox             |
| CH <sub>4</sub>                 | BoxCox             |
| CO <sub>2</sub>                 | BoxCox             |
